# Supplementary material for: Surface modified porous silicon with chitosan coating as a pH-responsive controlled delivery system for lutein
Source: Royal Society of Chemistry journal article supplement (doi:10.1039/d2fo00101b), 2022-01-01
Supplement: d2fo00101b1.pdf [file d2fo00101b1.pdf]

## **Surface modified porous silicon with chitosan coating as pH-responsive controlled delivery system for lutein**

Weiwei Li<sup>a#</sup>, Di Liu<sup>a#</sup>, Laicui Song<sup>a#</sup>, Hao Li<sup>a</sup>, Shijie Dai<sup>a</sup>, Ya Su<sup>a</sup>, Qianjin Li<sup>a</sup>, Jianlin Li<sup>a\*</sup>, Tiesong Zheng<sup>a\*</sup>

<sup>a</sup> School of Food Science and Pharmaceutical Engineering, Nanjing Normal University, Nanjing 210023, China

# These authors contributed to this work equally and should be regarded as co-first authors

\*Corresponding authors

Tel.: +86 25 85898183

E-mail addresses: jianlinli82003@aliyun.com or 45217@njnu.edu.cn (Jianlin Li); tieszheng@sina.com (Tiesong Zheng)

A

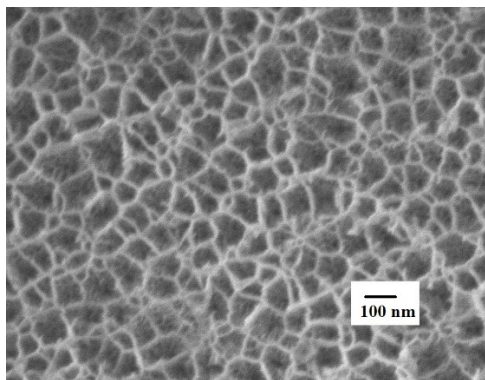

B

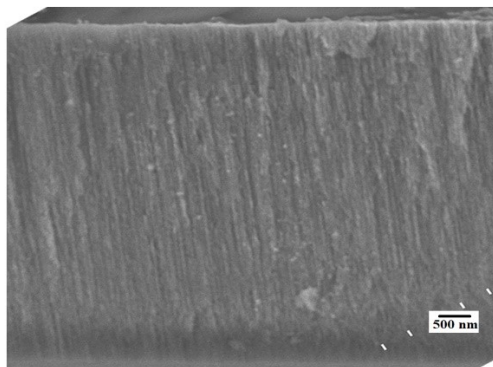

C

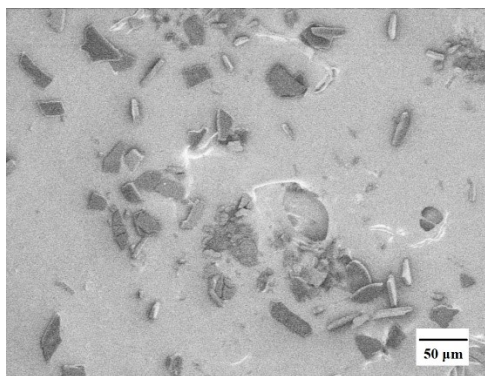

**Figure S1.** SEM images of PSi film: (A) top-surface; (B) cross-section; (C) PSi microparticles.

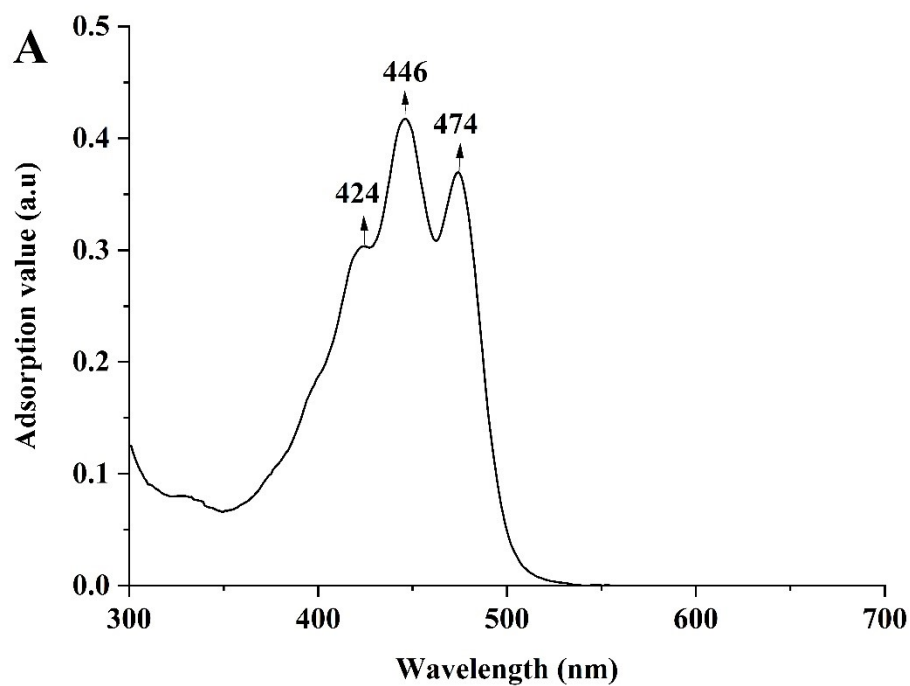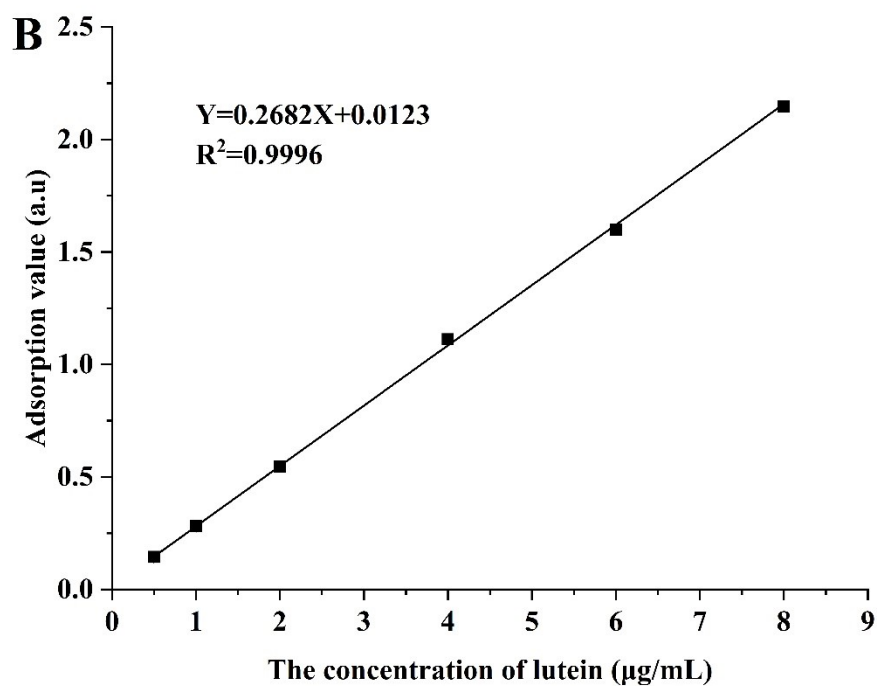

**Figure S2.** (A)The UV-visible absorption spectrum of lutein; (B) The standard curve of lutein detected by UV spectrophotometer.

**Table S1.** Results of recovery rate (n=3).

| Added lutein ( $\mu\text{g}$ ) | Detection ( $\mu\text{g}$ ) | Recovery rate (%) | ( $\bar{x}\pm\text{SD}$ )% | RSD% |
|--------------------------------|-----------------------------|-------------------|----------------------------|------|
| 100                            | 109.38                      | 109.38            | 108.25 $\pm$ 1.20          | 1.11 |
|                                | 108.78                      | 108.78            |                            |      |
|                                | 106.59                      | 106.59            |                            |      |
| 300                            | 324.79                      | 108.26            | 106.32 $\pm$ 1.41          | 1.32 |
|                                | 317.16                      | 105.72            |                            |      |
|                                | 314.93                      | 104.98            |                            |      |
| 500                            | 484.91                      | 96.98             | 97.07 $\pm$ 1.17           | 1.21 |
|                                | 492.73                      | 98.55             |                            |      |
|                                | 478.41                      | 95.68             |                            |      |

**Table S2.** Relationship between average cumulative release rates of lutein from CS-PSi and the dissolution time.

| pH  |                                |                                |       |       |       |       |                       |       |       |       |
|-----|--------------------------------|--------------------------------|-------|-------|-------|-------|-----------------------|-------|-------|-------|
| 5.0 | The dissolution time (h)       | 0                              | 0.5   | 1     | 2     | 3     | 4                     | 5     | 6     | 7     |
|     | Average cumulative release (%) | 0                              | 46.18 | 61.36 | 78.77 | 88.17 | 93.29                 | 96.65 | 97.41 | 96.49 |
|     | Equation                       | Y=62.488 (t <sup>0.258</sup> ) |       |       |       |       | R <sup>2</sup> =0.980 |       |       |       |
| 7.4 | The dissolution time (h)       | 0                              | 0.5   | 1     | 2     | 3     | 4                     | 5     | 6     | 7     |
|     | Average cumulative release (%) | 0                              | 36.71 | 52.35 | 70.20 | 81.99 | 85.62                 | 86.69 | 86.10 | 84.25 |
|     | Equation                       | Y=54.315 (t <sup>0.276</sup> ) |       |       |       |       | R <sup>2</sup> =0.955 |       |       |       |
| 8.5 | The dissolution time (h)       | 0                              | 0.5   | 1     | 2     | 3     | 4                     | 5     | 6     | 7     |
|     | Average cumulative release (%) | 0                              | 26.56 | 36.74 | 51.00 | 62.17 | 69.66                 | 73.54 | 76.48 | 79.10 |
|     | Equation                       | Y=38.392 (t <sup>0.393</sup> ) |       |       |       |       | R <sup>2</sup> =0.991 |       |       |       |
